# Supplementary material for: Thymosin β4 released from functionalized self-assembling peptide activates epicardium and enhances repair of infarcted myocardium
Source: PubMed Central journal article supplement (PMC7977468; doi:10.7150/thno.52309), 2021-02-20
Supplement: thnov11p4262s1.pdf [file thnov11p4262s1.pdf]

---

## SUPPLEMENTARY MATERIAL

### **Thymosin $\beta$ 4 released with functionalized self-assembling peptide activates epicardium and enhances repair of infarcted myocardium**

#### ***Running head: Activating Epicardium by SAP-released T $\beta$ 4***

Yong-li Wang<sup>1,2</sup>, Shu-na Yu<sup>1</sup>, Hao-ran Shen<sup>1</sup>, Hai-jie Wang<sup>1,\*</sup>, Xue-ping Wu<sup>1</sup>, Qiang-li Wang<sup>1,3</sup>, Bin Zhou<sup>4</sup>, Yu-zhen Tan<sup>1,\*</sup>

1. Department of Anatomy, Histology and Embryology, Shanghai Medical School of Fudan University, Shanghai 200032, China
2. Laboratory of Oral Microbiota and Systemic Diseases, Shanghai Ninth People's Hospital, College of Stomatology, Shanghai Jiao Tong University School of Medicine, Shanghai 200125, China.
3. School of Basic Medical Sciences, Shanghai University of Traditional Chinese Medicine, Shanghai 201203, China.
4. Shanghai Institute of Biochemistry and Cell Biology, Chinese Academy of Sciences, Shanghai 200032, China

To whom correspondence should be addressed to:

Yu-zhen Tan Professor, MD., PhD.

Department of Anatomy, Histology and Embryology

Shanghai Medical School of Fudan University

138 Yixueyuan Road, Shanghai 200032, People's Republic of China

Tel: +86-21-54237019-9306

E-mail: yztan@shmu.edu.cn

\* Corresponding author: Department of Anatomy, Histology and Embryology, Shanghai Medical School of Fudan University, 138 Yixueyuan Road, Shanghai 200032, People's Republic of China.

E-mail: yztan@shmu.edu.cn (YZ Tan); hjwang@shmu.edu.cn (HJ Wang)

**Table S1. The sequences of the primers**

| <b>Symbol</b>  | <b>Version</b> | <b>Sequence (5' to 3')</b>                                    | <b>Length</b> |
|----------------|----------------|---------------------------------------------------------------|---------------|
| bFGF           | NM_008006.2    | (F) GGCTGCTGGCTTCTAAGTG<br>(R) CCAACTGGAGTATTTCCGTGA          | 101 bp        |
| CD31           | NM_001032378.2 | (F) GCCAAGGCCAAACAGAAACC<br>(R) CCATGTTCTGGGGGTCTTTAT         | 178 bp        |
| CNN1           | NM_009922.4    | (F) CCCACAATCACCACCCGCACAATA<br>(R) TCATCTCCCCAAACCGTAACCCTAT | 165 bp        |
| cTnT           | NM_001130174.2 | (F) CGGGCGTTGGAAATAGATGA<br>(R) TAGGGGTCAGGCAGAGTACT          | 165 bp        |
| Cx43           | NM_010288.3    | (F) AAGGCGTGAGGGAAGTACCA<br>(R) GGAGTAGGCTTGGACCTTGT          | 215 bp        |
| GATA4          | NM_001310610.1 | (F) GGGATTCAAACCAGAAAACG<br>(R) GCTGTGCCCATAGTGAGATG          | 198 bp        |
| HGF            | NM_001289458.1 | (F) GGGACGGTATCCATCACT<br>(R) TTCGTAGCGTACCTCTGG              | 186 bp        |
| HIF-1 $\alpha$ | NM_001313919.1 | (F) TCGGCGAAGCAAAGAGTC<br>(R) CCATCTGTGCCTTCATCTCA            | 182 bp        |
| IGF-1          | NM_001111274.1 | (F) TGCCACATCACCGCAGGAT<br>(R) CCACGCCAGGACCACTTT             | 200 bp        |
| Mylk           | NM_139300.3    | (F) AAAAACCCTCTGGACTGCAC<br>(R) TCACAGCATTGCCCGTTTTTC         | 145 bp        |
| Nkx2.5         | NM_008700.2    | (F) CAGTGGAGCTGGACAAAGCC<br>(R) TAGCGACGGTCTGGAACCA           | 217 bp        |
| PDGF-BB        | NM_011057.3    | (F) TTAGCGGGCGAGTGAAGACG<br>(R) GGGAGGACCTGGACAAGGGA          | 196 bp        |
| Rock1          | NM_009071.2    | (F) AAGCTTTTGTGGCAATCAGC<br>(R) AACTTTCCTGCAAGCTTTTATCCA      | 129 bp        |
| SCF            | NM_001347156.1 | (F) GTCATTGTTGGCTACGAG<br>(R) CATAACACGAGGTCATCC              | 145 bp        |
| SDF-1          | NM_001012477.2 | (F) GTCAGCCTGAGCTACCGA<br>(R) GAAGGGCACAGTTTGGAG              | 103 bp        |
| Tbx18          | NM_023814.4    | (F) GTGGAGTCATACGCATTCTGGA<br>(R) GTGAGGATGTGTAGCAGGGACA      | 141 bp        |
| Tcf21          | NM_011545.1    | (F) CATTACCCAGTCAACCTGA<br>(R) CCACTTCCTTCAGGTCATTCTC         | 71 bp         |
| Vcl            | NM_009502.4    | (F) AACCAGCCAATGATGATGGC<br>(R) TTGGCTGCTGCAATGATGTC          | 89 bp         |
| VEGF           | NM_001025250.3 | (F) ACTATTCAGCGGACTCACCAG<br>(R) TGAGGGAGTGAAGAACCAACC        | 171 bp        |
| vWF            | NM_011708.4    | (F) GCGGTGTAAACGGACATCTC<br>(R) ACAGGTTCCGGGCATACTCAA         | 232 bp        |
| WT1            | NM_144783.2    | (F) GCCTTACCTTGCACCTTCTC                                      | 186 bp        |

|                |             |                                                                                         |        |
|----------------|-------------|-----------------------------------------------------------------------------------------|--------|
| $\alpha$ -SMA  | NM_007392.3 | (R) GACCGTGCTGTATCCTTGGT<br>(F) GGCTCTGGGCTCTGTAAGG                                     | 149 bp |
| $\beta$ -actin | NM_007393.5 | (R) CTCTTGCTCTGGGCTTCATC<br>(F) GGAGATTACTGCTCTGGCTCCTA<br>(R) GACTCATCGTACTCCTGCTTGCTG | 150 bp |

**Table S2. The primary sequences of the self-assembling peptides**

| Code     | Primary sequence                                        |
|----------|---------------------------------------------------------|
| RADA16-I | Ac-RADARADARADARADA-CONH <sub>2</sub>                   |
| RADA-RPR | Ac-(RADA) <sub>4</sub> GGRPRHQGVMRGDS-CONH <sub>2</sub> |

**Table S3. The antibodies used**

| Antibody                | Dilution | Company                              | Application        |
|-------------------------|----------|--------------------------------------|--------------------|
| Chicken anti-GFP        | 1:100    | Novus Biologics, Littleton, CO, USA  | Immunofluorescence |
| Rabbit anti-Aurora B    | 1:100    | Sigma-Aldrich, Saint Louise, MO, USA | Immunofluorescence |
| Rabbit anti-CCR7        | 1:100    | Abcam, Cambridge, MA, USA            | Immunofluorescence |
| Rabbit anti-Cx43        | 1:100    | Abcam, Cambridge, MA, USA            | Immunofluorescence |
| Rabbit anti-GFP         | 1:50     | Santa Cruz Biotech, Dallas, TX, USA  | Immunofluorescence |
| Rabbit anti-LYVE-1      | 1:200    | Novus Biologics, Littleton, CO, USA  | Immunofluorescence |
| Rabbit anti-Tbx18       | 1:100    | Abcam, Cambridge, MA, USA            | Immunofluorescence |
| Rabbit anti-T $\beta$ 4 | 1:200    | Santa Cruz Biotech, CA, USA          | Immunofluorescence |
| Rabbit anti-WT1         | 1:100    | Santa Cruz Biotech, CA, USA          | Immunofluorescence |
| Mouse anti-CD31         | 1:100    | Abcam, Cambridge, MA, USA            | Immunofluorescence |
| Mouse anti-CD31         | 1:100    | BDBiosciences, San Jose, CA, USA     | Immunofluorescence |
| Mouse anti-CD68         | 1:100    | Santa Cruz Biotech, Dallas, TX, USA  | Immunofluorescence |
| Mouse anti-cTnT         | 1:200    | Santa Cruz Biotech, CA, USA          | Immunofluorescence |
| Mouse anti-Ki-67        | 1:200    | Abcam, Cambridge, MA, USA            | Immunofluorescence |

|                                                    |        |                                      |                    |  |
|----------------------------------------------------|--------|--------------------------------------|--------------------|--|
|                                                    |        |                                      | MA, USA            |  |
| Mouse anti- $\alpha$ -SMA                          | 1:100  | Abcam, Cambridge, MA, USA            | Immunofluorescence |  |
| Goat anti-chicken (conjugated with DyLight 488)    | 1:400  | Novus Biologics, Littleton, CO, USA  | Immunofluorescence |  |
| Goat anti-mouse (conjugated with Alexa Fluor 594)  | 1:400  | Jackson, West Grove, PA, USA         | Immunofluorescence |  |
| Goat anti-mouse (conjugated with Alexa Fluor 488)  | 1:400  | Jackson, West Grove, PA, USA         | Immunofluorescence |  |
| Goat anti-mouse (conjugated with Alexa Fluor 647)  | 1:400  | Jackson, West Grove, PA, USA         | Immunofluorescence |  |
| Goat anti-rabbit (conjugated with Alexa Fluor 488) | 1:400  | Jackson, West Grove, PA, USA         | Immunofluorescence |  |
| Goat anti-rabbit (conjugated with DyLight 594)     | 1:400  | Abcam, Cambridge, MA, USA            | Immunofluorescence |  |
| Mouse anti-cTnT                                    | 1:1000 | Santa Cruz Biotech, CA, USA          | Western Blotting   |  |
| Mouse anti- $\beta$ -actin                         | 1:4000 | Sigma-Aldrich, Saint Louise, MO, USA | Western Blotting   |  |

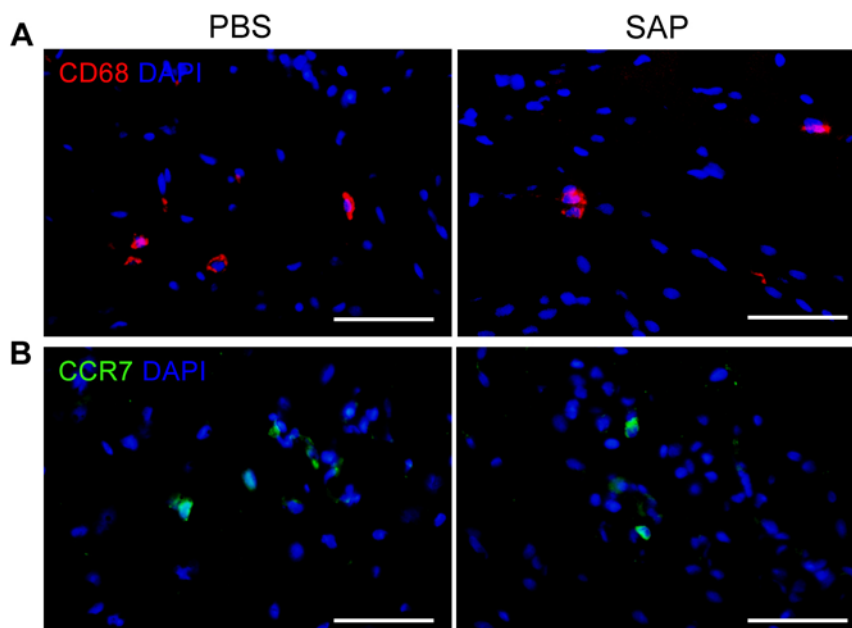

**Figure S1. The distribution of CD68<sup>+</sup> or CCR7<sup>+</sup> immune cells at 1 week after**

subcutaneous injection of the SAP. Immunostaining. Scale bar = 50  $\mu$ m.

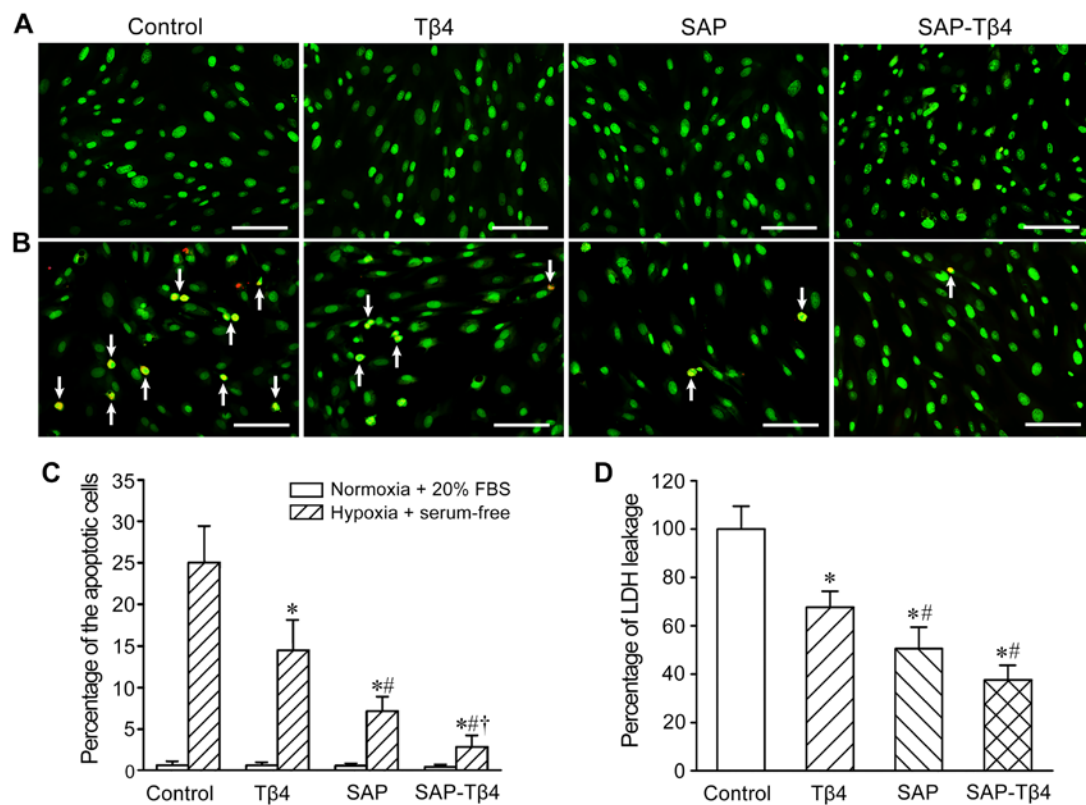

**Figure S2. The protection of T $\beta$ 4 on survival of EPDCs.** (A) EPDCs incubated in normoxic condition. (B) EPDCs treated with hypoxia (1% O<sub>2</sub>) and serum-free for 12 h. Arrows indicate the apoptotic cells. EB/AO staining. Scale bar = 100  $\mu$ m. (C) Statistical result of the number of the apoptotic cells. n = 5. (D) The concentration of LDH in the condition of hypoxia and serum deprivation. n = 5. \* $p$  < 0.01 versus control group; # $p$  < 0.05 versus T $\beta$ 4 group; † $p$  < 0.05 versus SAP group.

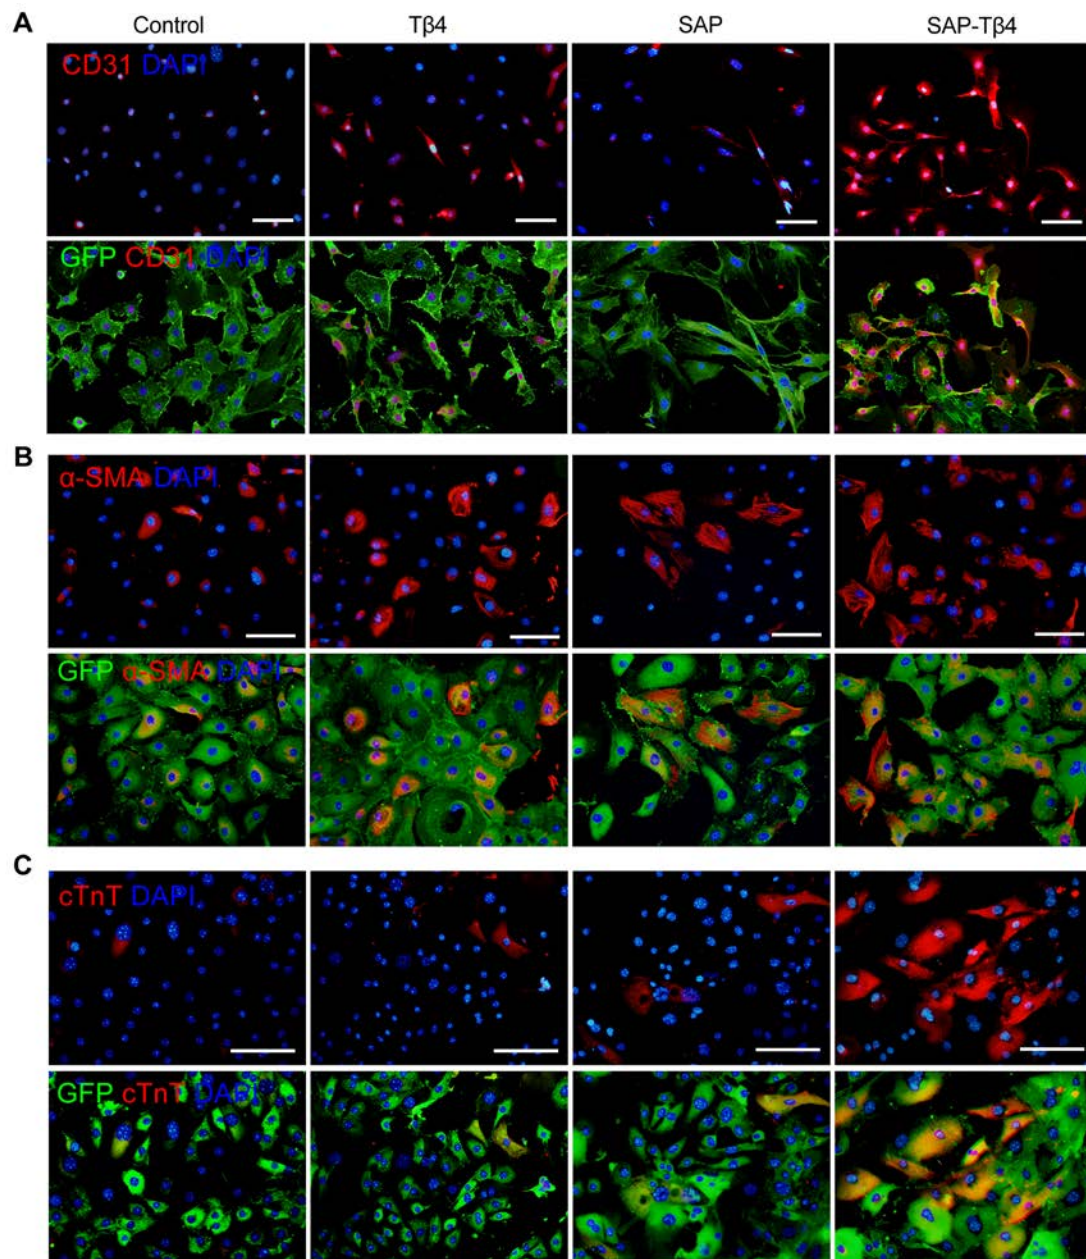

**Figure S3. SAP-released T $\beta$ 4 promotes differentiation of EPDCs towards cardiovascular cells. (A) CD31<sup>+</sup> cells differentiated from EPDCs. (B)  $\alpha$ -SMA<sup>+</sup> cells differentiated from EPDCs. (C) cTnT<sup>+</sup> cells differentiated from EPDCs. Immunostaining. Scale bar = 50  $\mu$ m.**

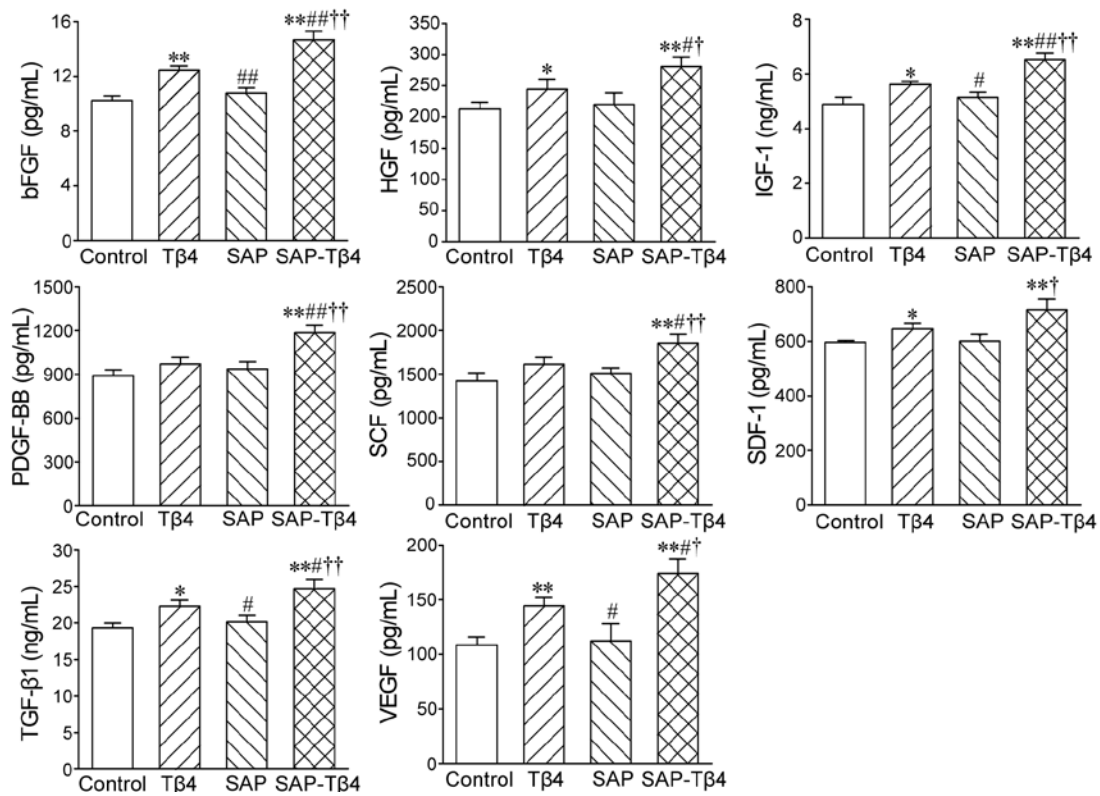

**Figure S4. Paracrine factors secreted by EPDCs.** The cells were incubated for one week. ELISA. \* $p < 0.05$  and \*\* $p < 0.01$  versus control group; # $p < 0.05$  and ## $p < 0.01$  versus Tβ4 group; † $p < 0.05$  and †† $p < 0.01$  versus SAP group.  $n = 3$ .

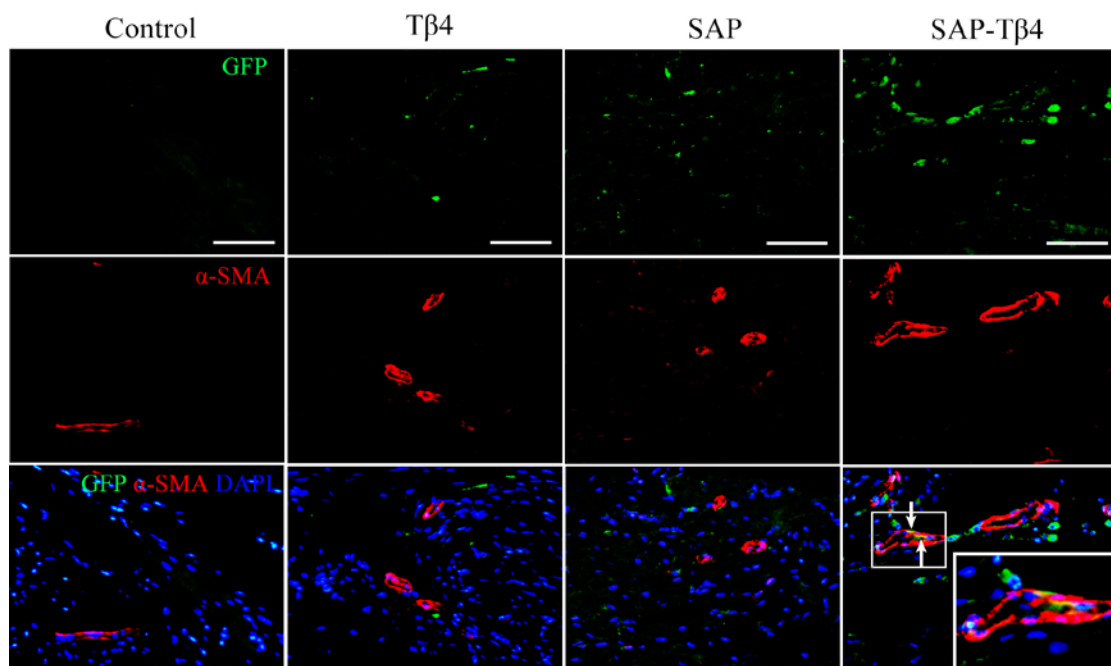

**Figure S5. EPDCs differentiate into smooth muscle cells at 4 weeks after**

**implantation.**  $\alpha$ -SMA<sup>+</sup> cells differentiated from EPDCs (arrows) are located at the wall of the microvessels at the infarcted region. The large box is magnification of the small box. Immunostaining. Scale bar = 100  $\mu$ m.

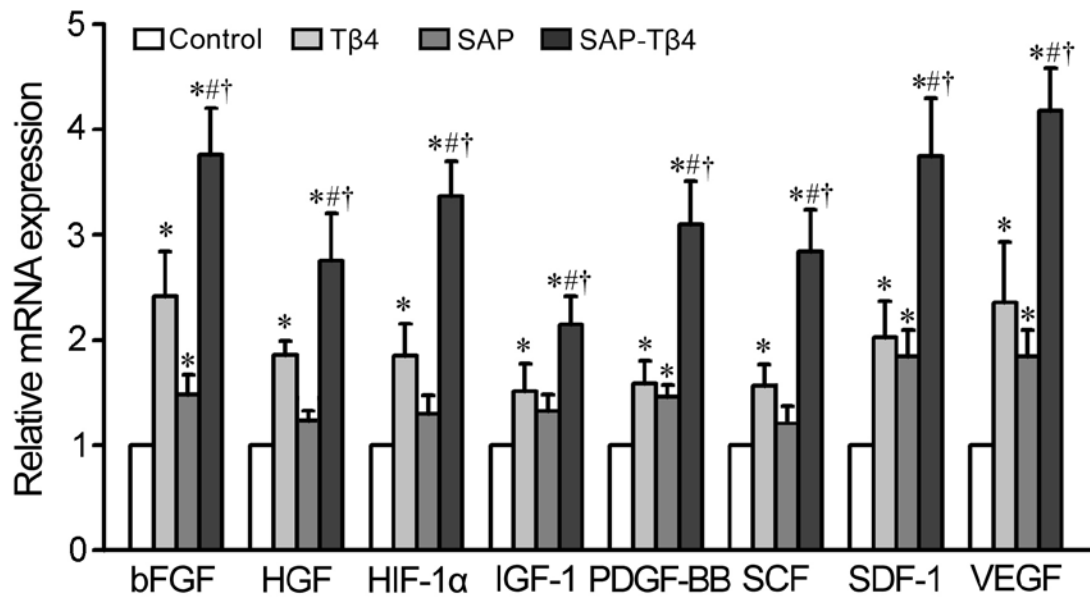

**Figure S6. Expression of the genes in the infarcted myocardium at 1 week after implantation.** qRT-PCR analysis. \* $p < 0.05$  versus control group; # $p < 0.05$  versus T $\beta$ 4 group; † $p < 0.05$  versus SAP group.  $n = 4$ .
